# Supplementary material
Source: publisher figshare collection journal article supplement (https://karger.figshare.com/ndownloader/files/33079193)
Supplement: Supplementary file 1 [file 33079193]

Supplementary Table 2-2. Characteristics of all the studies included in the meta-analysis.

| Author, year | Modified Glasgow score | | APACHE II | | CRP | | Length of hospital stay (days) | | Mortality(%) | |
| --- | --- | --- | --- | --- | --- | --- | --- | --- | --- | --- |
| Experimental | Control | Experimental | Control | Experimental | Control | Experimental | Control | Experimental | Control |
| Dellinger, 2007 | 4.2 | 3.4 | 12.7 | 11.5 | 274.0 | 262.0 | NR | NR | 20.0 | 18.0 |
| Ho, 1997 | NR | NR | NR | NR | NR | NR | NR | NR | 5.3 | 16.0 |
| Nakaharai, 2018 | NR | NR | NR | NR | NR | NR | NR | NR | NR | NR |
| Nordback, 2001 | 3.0 | 3.0 | NR | NR | 211.0 | 214.0 | 21.0 | 17.0 | 8.0 | 15.2 |
| Poropat, 2019 | NR | NR | 10.4 | 10.0 | 153.4 | 158.4 | NR | NR | 14.3 | 16.3 |
| Rokke, 2007 | NR | NR | 7.0 | 6.0 | 228.0 | 240.0 | 18.0 | 22.0 | 8.3 | 10.8 |
| Xue, 2009 | NR | NR | 12.7 | 11.9 | NR | NR | 28.3 | 30.7 | 10.3 | 14.8 |

APACHE II, Acute Physiology and Chronic Heath Evaluation II; CRP, C-reactive protein; NR, not reported.
